# Supplementary material
Source: publisher figshare collection journal article supplement (https://sage.figshare.com/ndownloader/files/14074343)
Supplement: Supplementary file 1 [file 14074343]

## For online only publication

### Examples of attitude, intention and dietary knowledge items

---

#### Attitude items

1. For me, eating junk food everyday would be:  
Unenjoyable 1 2 3 4 5 Enjoyable  
Harmful 1 2 3 4 5 Beneficial
2. For me, eating vegetables everyday would be:  
Unenjoyable 1 2 3 4 5 Enjoyable  
Harmful 1 2 3 4 5 Beneficial

#### Intentions items

1. I intend to limit unhealthy eating each day from now on  
Strongly agree 1 2 3 4 5 Strongly disagree
2. I intend to eat fruit and vegetables each day from now on  
Strongly agree 1 2 3 4 5 Strongly disagree

#### Knowledge items

1. In the food guide pyramid, what group has the most suggested servings?  
 Grain group  
 Fat group  
 Milk group
  2. What food is rich in vitamin c?  
 Orange  
 Nut  
 Meat
  3. In the food guide pyramid, what group is good for strong teeth and bone?  
 Fruit group  
 Milk group  
 Grain group
  4. Which foods give you the most energy?  
 Rice  
 Fruit  
 Keropok (fish cracker)
  5. Which foods contain high fibre?  
 Burger  
 Fish  
 Vegetable
  6. Protein can be found in  
 Fruit and vegetable  
 Fish and meat  
 Candy and ice cream
-

- 
7. Which food does not contain nutrients  
 Rice  
 Junk food  
 Fish
  8. Which food could contain too much colouring?  
 Orange  
 Colourful candy  
 Bread
  9. Which food could contain too much preservative?  
 Vegetable  
 Chicken nugget  
 *Jeruk* (pickle)
  10. Which beverage contain too much sugar?  
 Tea  
 Soda drink  
 Fruit juice
  11. Which food causes tooth decay?  
 Cheese  
 Burger  
 Candy
  12. Which drink is considered unhealthy:  
 Coffee  
 Chocolate drink  
 *Poly* juice (drink which contains colourful food dye)
  13. Which food contains too much salt?  
 Nugget  
 Burger  
 Salty snack
  14. What is the disease associated with the lack of fruit and vegetable intake?  
 Cancer  
 Kidney problem  
 Dengue fever
  15. Foods that contain preservatives and food dyes like pickles, colourful jelly and candy can cause  
 Dengue fever  
 Flu  
 Cancer
  16. Eating too much sugary food is link to what type of disease?  
 Diabetes  
 High blood pressure  
 Flu
  17. Consuming too much salty food can cause  
 Dengue fever  
 High blood pressure  
 Flu
-

- 
18. Which of the following condition can cause heart disease?
- Eating too much fat
  - Eating too much fruits
  - Eating too much vitamin
19. Being overweight and obese can increase the risk of
- Heart disease
  - Dengue fever
  - Flu
20. Lack of nutrients may
- cause stunted
  - cause good health
  - protect you from *disease* and *infection*.
-
